# Supplementary material for: Carbon coated K0.8Ti1.73Li0.27O4: a novel anode material for sodium-ion batteries with a long cycle life
Source: Royal Society of Chemistry journal article supplement (doi:10.1039/c4cc08051c), 2014-12-01
Supplement: c4cc08051c1.pdf [file c4cc08051c1.pdf]

## Supporting Information

### Carbon coated $\text{K}_{0.8}\text{Ti}_{1.73}\text{Li}_{0.27}\text{O}_4$ : A novel anode material for sodium-ion batteries with long cycle life

Kong-yao Chen, Wu-xing Zhang\*, Yang Liu, Hua-ping Zhu, Jian Duan, Xing-hua Xiang, Li-hong Xue, Yun-hui Huang\*

State Key Laboratory of Material Processing and Die & Mould Technology, School of Materials Science and Engineering, Huazhong University of Science and Technology, Wuhan, 430074, P. R. China. Email: zhangwx@mail.hust.edu.cn, huangyh@mail.hust.edu.cn

#### Experimental

##### 1. Synthesis

Stoichiometric  $\text{K}_2\text{CO}_3$ ,  $\text{TiO}_2$  and  $\text{Li}_2\text{CO}_3$  (10% excess) were mixed and grounded for 20 min, then  $\text{K}_2\text{MoO}_4$  as fluxing agent was added in the above mixture with a mole ratio of  $\text{KTLO}/\text{K}_2\text{MoO}_4$  equal to 3/7. The mixture was grounded and heated at 1100 °C for 5 h in air. After the heat treatment, the sample was washed with boiling water for several times to remove  $\text{K}_2\text{MoO}_4$ , and then dried at 120 °C for 10 h. The as-prepared KTLO was ball milled at 180 rpm for 10 h to obtain BM-KTLO. The BM-KTLO was then heated at 600 °C for 2 h in  $\text{Ar}/\text{C}_2\text{H}_2$  to prepare C@BM-KTLO.

##### 2. Characterization

The crystalline structure was characterized by X-ray diffraction (XRD, PANalytical B.V., Holland). The morphology was observed with scanning electron microscopy (SEM, SIRION200) and transmission electron microscopy (TEM, JEOL 2100). X-ray photoelectron spectroscopy (XPS) was measured on a VG MultiLab 2000 system with a monochromatic Al  $\text{K}\alpha$  X-ray source (ThermoVG Scientific). The thermo gravimetric analysis and differential thermal analysis (TG/DTA) was performed with a Netzsch STA 449F3 analyzer in air from 50 to 800 °C at a heating rate of 10 °C  $\text{min}^{-1}$ . CR 2032 coin cell was assembled in Ar-filled glove box to test the electrochemical performance. Typically, the working electrode was prepared by casting a slurry of 70 wt% active material, 20 wt% Super-P (SP) and 10% poly(vinyl difluoride) (PVDF) mixed in N-methyl pyrrolidinone (NMP) onto a Cu foil. After dried at 80 °C for 10 h, the foil was roll pressed and cut into round disks with a diameter of 8 mm. The active material load of each disk is about 1  $\text{mg cm}^{-2}$ . The counter electrode was sodium foil and the separator was glass fibers. 1 M  $\text{NaClO}_4$  dissolved in propylene carbonate/ethyl carbonate (1:1 v/v ratio) was used as electrolyte solution. The coin cells were galvanostatically discharged/charged at different current densities between 0.001 and 2 V by using a battery testing system (Neware, China) at room temperature.

Cyclic voltammetric measurements were carried out at a scan rate of  $0.1 \text{ mV S}^{-1}$  using a CHI 660d electrochemical workstation (ChenHua Instruments Co., Shanghai, China).

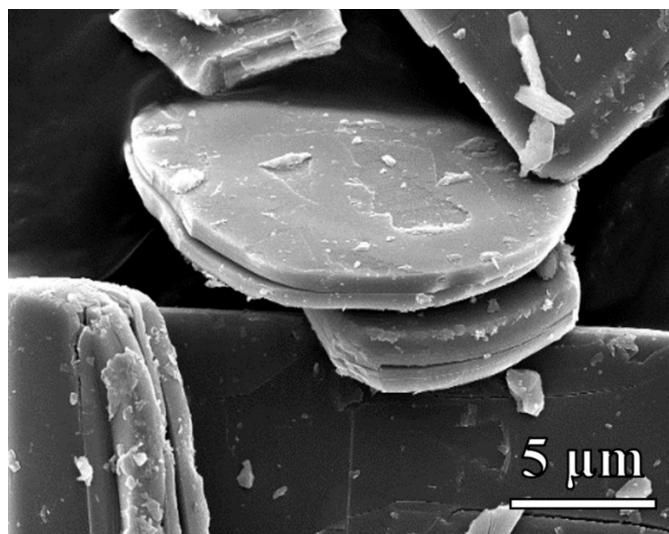

Fig. S1 SEM image of as-prepared KTLO.

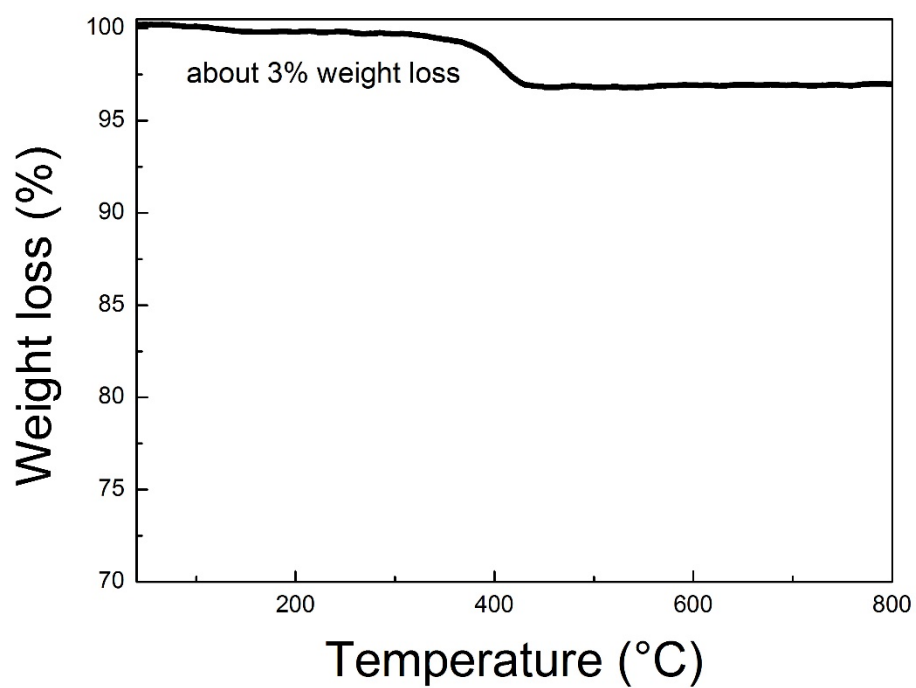

Fig. S2 TG analysis of C@BM-KTLO in air.

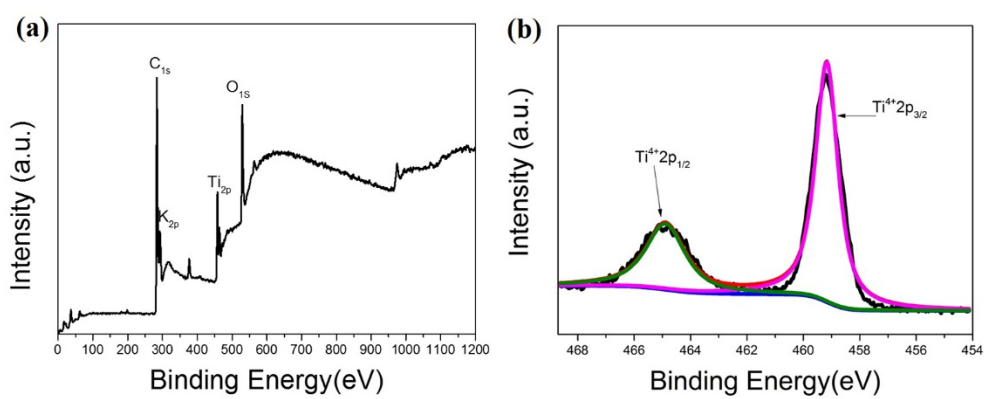

Fig. S3 (a) Survey XPS spectrum of C@BM-KTLO. (b) High-resolution XPS spectrum of Ti<sub>2p</sub> in C@BM-KTLO.

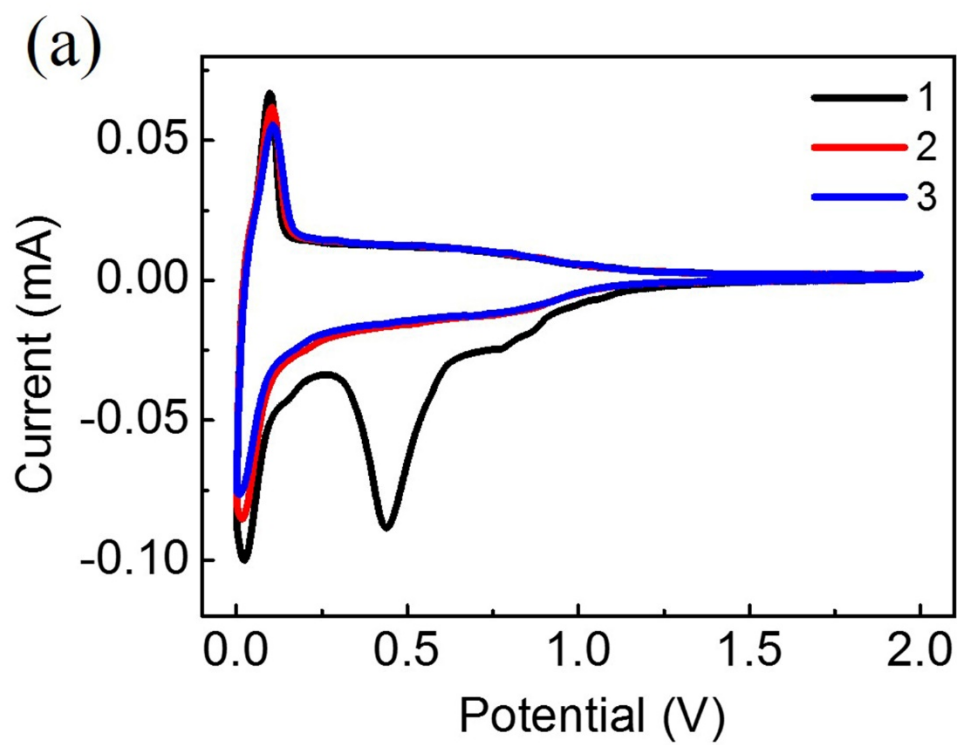

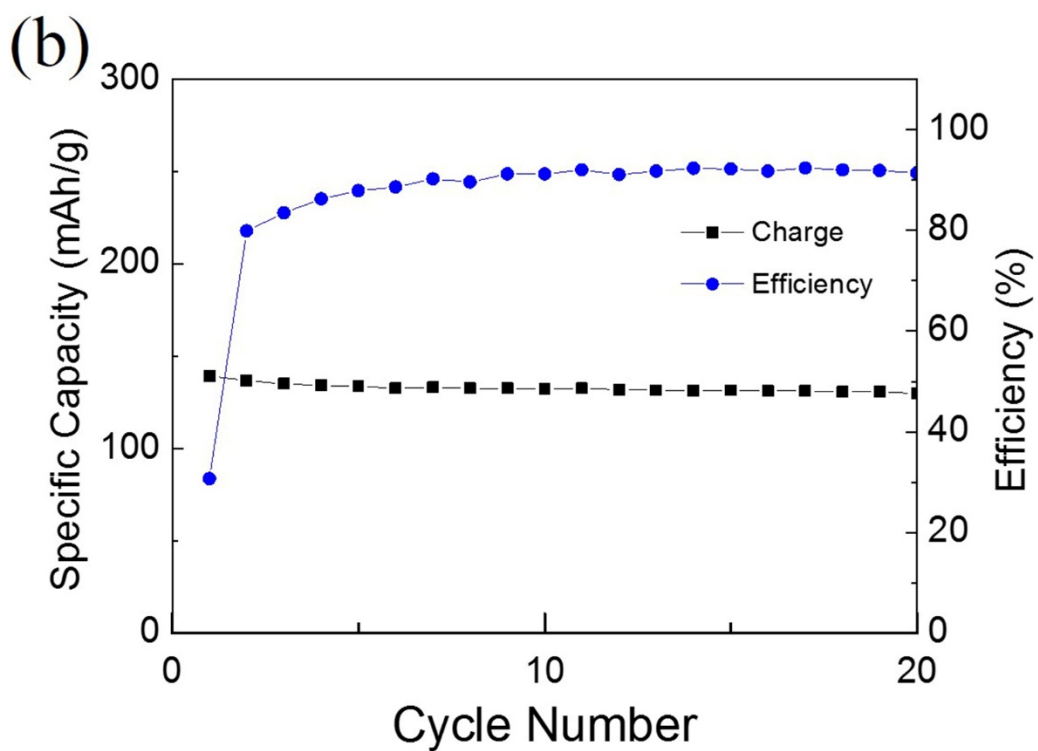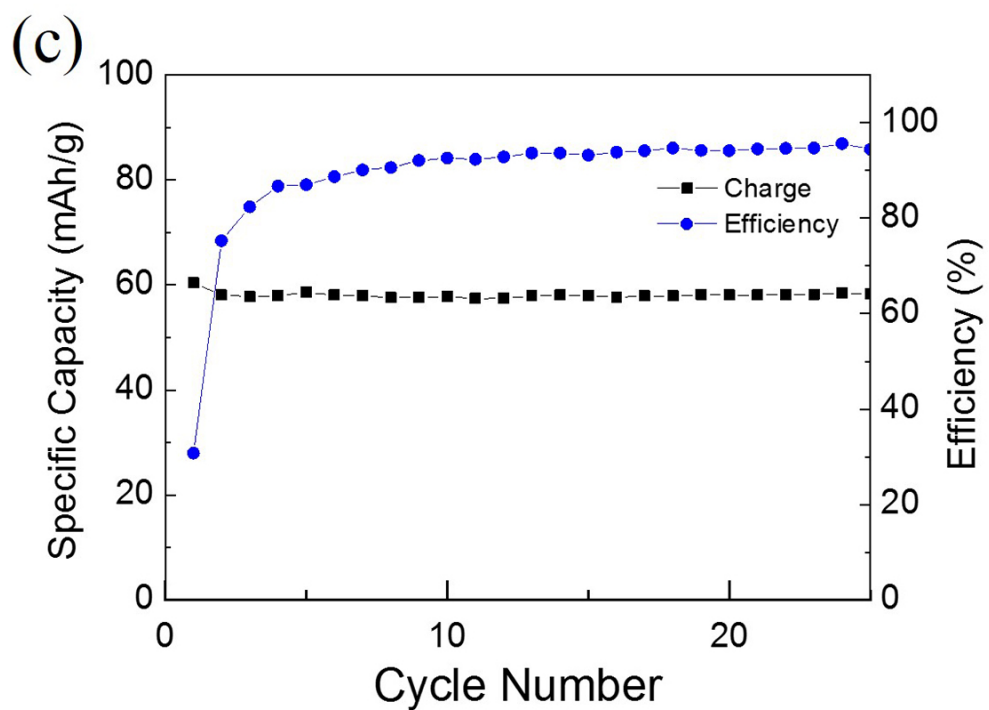

Fig. S4 (a) CV curves of SP electrode at a scan rate of  $0.1 \text{ mV S}^{-1}$  from  $0.001 \text{ V}$  to  $2 \text{ V}$  vs.  $\text{Na}^+/\text{Na}$ . Desodiation cycling performance of the (b) SP electrode and (c)  $\text{C@BM-KTLO}$  electrode without SP.

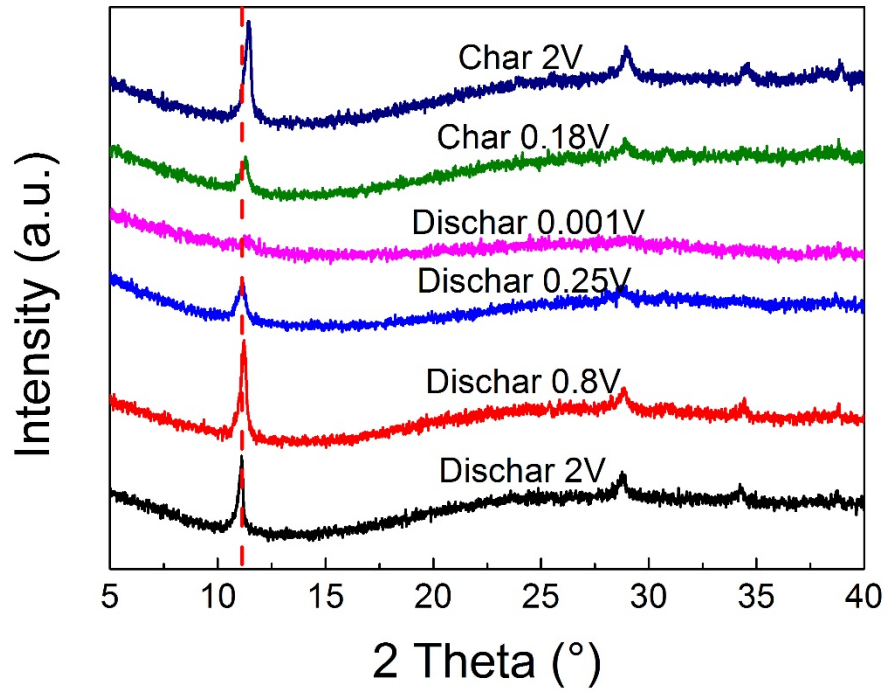

Fig. S5 Ex-situ XRD patterns of C@BM-KTLO during charge and discharge.

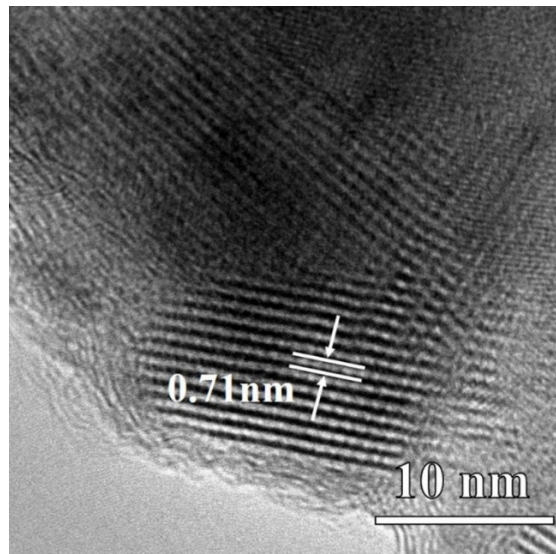

Fig. S6 HRTEM image of C@BM-KTLO after 50 cycles.
